# Supplementary material for: Screening Method for the Discovery of Potential Bioactive Cysteine-Containing Peptides Using 3D Mass Mapping
Source: PubMed Central journal article supplement (PMC4654750; doi:10.1007/s13361-015-1282-z), 2015-11-09

# Supplementary figure 1

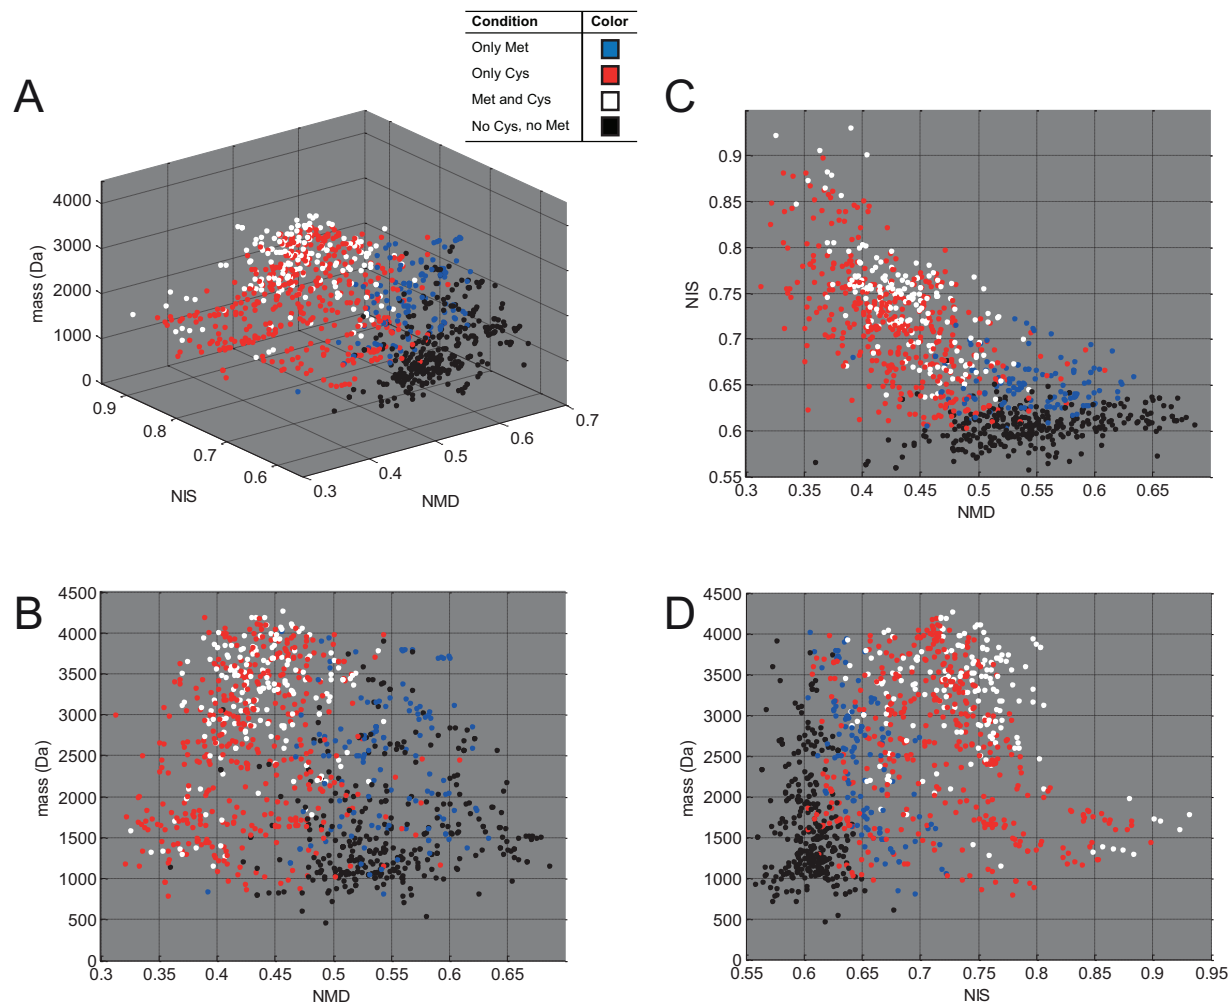

Supplement: 13361_2015_1282_MOESM1_ESM.pdf [file 13361_2015_1282_MOESM1_ESM.pdf]
