# Supplementary material for: Screening Method for the Discovery of Potential Bioactive Cysteine-Containing Peptides Using 3D Mass Mapping
Source: PubMed Central journal article supplement (PMC4654750; doi:10.1007/s13361-015-1282-z), 2015-11-09
Supplement: 13361_2015_1282_MOESM5_ESM.pdf [file 13361_2015_1282_MOESM5_ESM.pdf]

|                                                         |    |
|---------------------------------------------------------|----|
| Script to process mzXML file .....                      | 1  |
| Erase all temporary files.....                          | 2  |
| Define required information and define variables.....   | 2  |
| Import mzXML to a MATLAB structure .....                | 3  |
| Add ScanType to 'peaklist'.....                         | 3  |
| Extract scan number.....                                | 3  |
| Extract zoom scans.....                                 | 4  |
| Delete all spectra based on highest intensity peak..... | 4  |
| Delete zoom scans were only one peak is present .....   | 4  |
| Remove noise from spectra .....                         | 5  |
| Delete zoom scans were only one peak is present .....   | 6  |
| Calculate charge and monoisotopic mass.....             | 6  |
| Calculate mass of isotopomers .....                     | 7  |
| Calculate the mass difference between isotopomers.....  | 7  |
| Calculate average mass .....                            | 8  |
| Add scan number to data matrix.....                     | 8  |
| Data generation for 3D plot .....                       | 9  |
| Remove miscalculated NMD values .....                   | 9  |
| Remove miscalculated NIS values .....                   | 10 |
| Add fraction number to matrix 'mass3' .....             | 11 |
| Generate the 3D mass map.....                           | 11 |
| 3D mass map properties .....                            | 11 |
| Set view of 3D mass map .....                           | 12 |
| Export table 'mass3' to an EXCEL file .....             | 12 |

## Script to process mzXML file

```
% The following script accompanies the article "Screening method for the
% discovery of potential bioactive cysteine-containing peptides using 3D
% mass mapping" and in particular Figure 2D, 2E, 4A, 4B, 4C and 4D.

% In this script, mzXML-files containing raw MS data are imported into
% a MATLAB structure for further analysis. The mzXML-files were generated
% from Thermo *.raw-files using the ReAdW software (version 2.0,
% publicly available at
% <http://sourceforge.net/projects/sashimi/files/>. Subsequent analysis
% of the data was done using MATLAB and the Bioinformatics Toolbox,
% version 8.3.0.532 (R2014a) on a Microsoft Windows 8 Version 6.2 (Build
% 9200) operating system. The version of Java installed was 1.7.0_11-b21
% with Oracle Corporation Java HotSpot(TM) 64-Bit Server VM, mixed mode.
```

```

% From the MATLAB structure generated, the zoom scan events are extracted.
% From each zoom scan spectrum the monoisotopic and average mass is
% calculated from the observed isotopomers. Using the monoisotopic mass and
% the average mass the nominal mass, NMD and NIS (equation 1, 2 and 3 in
% the corresponding article respectively) are calculated. Subsequently a
% three-dimensional plot is generated (NMD vs NIS vs monoisotopic mass) as
% described in the article. Corresponding data from the LC-MS run is
% exported into an EXCEL-file (*.xlsx extension).

% Disclaimer: the authors would like to state that this script has been
% used only with data obtained using an LTQ-Orbitrap Velos mass
% spectrometer (Thermo Scientific).

% For questions, clarification, tips or feedback try to seek
% contact through the MATLAB File Exchange
% (http://www.mathworks.com/matlabcentral/fileexchange/) or contact the
% authors of the corresponding article directly.

```

## Erase all temporary files

```

% Clear the workspace, close all windows and clear the command-window.

clear all
close all
clc

```

## Define required information and define variables

```

% Raw data was generated using an Thermo LTQ velos orbitrap. The resulting
% Thermo *.raw files were converted to *.mzXML files using the ReAdw
% software.
% Make sure that the mzXML file is conform the mzXML 2.1 specifications or
% EARLIER versions, otherwise the matlab function 'mzxmlread' will not be
% able to process the mzXML file.

% Samples may be fractionated before LC-MS analysis. In that case it is
% helpful to indicate in the final *.xlsx file the fraction number, as well
% as a proper title (For example the same title of the original *.mzxml
% file).

% In this script, zoom scans are extracted based on intensity of the
% most intense ion as a threshold. It was found (using trial and error)
% that an ion count of 50,000 for the highest peak per spectrum
% corresponded to high quality zoom scan spectra. The value can be adjusted
% here accordingly

% To remove noise from the zoom scan spectra, all peaks with an intensity
% below 3% of the most intense peak are discarded. This percentage can be
% adjusted in this section

% specify the mzXML data file.
datafile = 'your_mzxmlfile.mzxml';

% specify fraction number.
Fraction_nr = 1;

```

```

% specify title for exported *.xlsx file.
title = 'filename_fraction_nr';

% specify threshold intensity value for highest peak.
highestpeak = 50000;

% specify noise removal threshold.
percentage = 0.03;

% specify mass of proton.
mass_proton = 1.00727;

```

## Import mzXML to a MATLAB structure

```

% Build the mzXML structure using 'mzxmlread' from the bioinformatics
% toolbox.
mzxml_struct = mzxmlread(datafile);

% Store all scans in cell array 'peaklist'. Each scan is a matrix inside
% the cell array. The first column of this matrix indicates m/z values, the
% second column the ion intensities of that corresponding m/z value.
[peaklist] = mzxml2peaks(mzxml_struct, 'Levels', [1;2]);

```

## Add ScanType to 'peaklist'

```

% Indicates which scan events are of the type 'Full' (the case for full and
% MS2 scan events) or 'SIM' (selected ion monitoring; the zoom scan events).

% loop over the length of the peaklist (containing all scan events), and
% add the scan type (as a string) in the next column of cell array 'peaklist'.
for i=1:length(peaklist)

    % Generate the cell array 'scanType' from mzXML_struct.scan.scanType.
    % This cell array 'scanType' holds the information (Full or SIM) in the
    % first column as a string.
    scanType = {mzxml_struct.scan.scanType}';

    % Copy the first column of the cell array 'scanType' to the second column
    % of the cell array 'peaklist'.
    peaklist{i,2} = scanType{i,1};

end % close the loop

```

## Extract scan number

```

% To keep track of which scan (with corresponding scan type) corresponds to
% which scan number in the original *.raw file, the scan number is added to
% the third column of the cell array 'peaklist'.

% loop over the length of 'peaklist' and add the scan number.
for i=1:length(peaklist)

    % Create a new cell array called 'num' from mzXML_struct.scan.num. This

```

```

% cell array 'num' holds the scan numbers in the first column
num = {mzxml_struct.scan.num}';

% copy the first column of the array 'num' to the third column of the
% array 'peaklist'.
peaklist{i,3} = num{i,1};

end % close the loop

```

## Extract zoom scans.

```

% Create cell array 'peaklist_SIM' containing only SIM scan (zoom scan) events by
% searching 'peaklist' for the exact match 'SIM'.
peaklist_SIM = peaklist(strmatch('SIM', peaklist(:,2), 'exact'),1:3);

```

## Delete all spectra based on highest intensity peak

```

% Zoom spectra of poor quality (indicated by low intensity peaks) are
% discarded on basis of the intensity of the highest peak in that spectrum.
% The threshold value is set in the second section under 'highestpeak'.
% Remaining scans are stored in 'peaklist_Q'.

% start to write at row 1 when storing information in 'peaklist_Q'.
row = 1;

% loop over the length of peaklist_SIM (which contains all zoom scan
% events).
for i=1:length(peaklist_SIM)

    % Check if the maximum ion intensity in each scan event is higher than
    % the set threshold of 'highestpeak'
    if max(peaklist_SIM{i,1}(:,2)) > highestpeak

        % preserve relevant accompanying info of spectrum.
        peaklist_Q{row,1} = peaklist_SIM{i,1};
        peaklist_Q{row,2} = peaklist_SIM{i,2};
        peaklist_Q{row,3} = peaklist_SIM{i,3};

        % move to next row.
        row = row + 1;

    end % close the loop

end % close the loop

```

## Delete zoom scans were only one peak is present

```

% Spectra with only one peak are removed. Remaining scan events
% are stored in 'peaklist_Q2'.

% start to write at row 1 when storing information in 'peaklist_Q2'.
row = 1;

% loop over the length of peaklist_Q (containing all scan events with a

```

```

% peak over 50,000 counts).
for i=1:length(peaklist_Q);

    % Check if the amount of remaining peaks in a spectrum-matrix are more
    % than 1.
    if length(peaklist_Q{i,1}(:,1)) >= 2

        % preserve relevant accompanying info of the spectrum
        peaklist_Q2{row,1} = peaklist_Q{i,1};
        peaklist_Q2{row,2} = peaklist_Q{i,2};
        peaklist_Q2{row,3} = peaklist_Q{i,3};

        % move to the next row.
        row = row + 1;

    end % close the loop

end % close the loop

```

## Remove noise from spectra

```

% remove noise peaks with an intensity below 3% of the maximum intensity.

% start to write at row 1 when storing information in 'peaklist_denoised'.
row = 1;

% loop over the length of peaklist_Q2 (containing all spectra with more
% than one peak and one peak over 50,000 counts).
for i=1:length(peaklist_Q2)

    % start to count at 1.
    count = 1;

    % Calculate threshold ion intensity as percentage of the maximum
    % intensity per spectrum.
    threshold = max(peaklist_Q2{i,1}(:,2)) * percentage;

    % loop over the length of peaklist_Q2.
    for j = 1:length(peaklist_Q2{i,1})

        if peaklist_Q2{i,1}(j,2) > threshold

            % preserve relevant accompanying info per spectrum
            peaklist_denoised{row,1}{count,1} = peaklist_Q2{i,1}(j,1);
            peaklist_denoised{row,1}{count,2} = peaklist_Q2{i,1}(j,2);
            peaklist_denoised{row,2} = peaklist_Q2{i,2};
            peaklist_denoised{row,3} = peaklist_Q2{i,3};
            count = count + 1;

        end % close the loop

    end % close the loop

    % move to the next row.
    row = row + 1;

```

```
end % close the loop
```

## Delete zoom scans where only one peak is present

```
% Spectra with one remaining peak are removed

% start to write at row 1 when storing information in 'peaklist_denoised2'.
row = 1;

% loop over peaklist_denoised.
for i=1:length(peaklist_denoised)

    % Check if the amount of remaining peaks in a spectrum-matrix are more
    % than 1.
    if length(peaklist_denoised{i,1}(:,1)) >= 2

        % preserve relevant accompanying info per spectrum
        peaklist_denoised2{row,1} = peaklist_denoised{i,1};
        peaklist_denoised2{row,2} = peaklist_denoised{i,2};
        peaklist_denoised2{row,3} = peaklist_denoised{i,3};

        % move to next row.
        row = row+1;

    end % close the loop.

end % close the loop.
```

## Calculate charge and monoisotopic mass

```
% The m/z values are sorted descending. The charge (z) and the monoisotopic
% mass of the peptide are calculated by  $z = 1/(m/z1 - m/z2)$ , where m/z1
% and m/z2 are adjacent isotopomers in a spectrum.

% loop over peaklist_denoised2.
for i=1:length(peaklist_denoised2);

    % sort ion intensities descending
    peaklist_denoised2{i,1} = sortrows(peaklist_denoised2{i,1},-2);

    % calculate charge (z).
    z = abs(round((1/(peaklist_denoised2{i,1}{1,1} - peaklist_denoised2{i,1}{2,1})))));

    % loop over peaklist_denoised2.
    for j=1:length(peaklist_denoised2{i,1}(:,1));

        % store charge (z) in column 3 of the matrix describing the
        % scan event.
        peaklist_denoised2{i,1}{j,3} = z;

    end % close the loop

    % Sort m/z values in a scan ascending.
    peaklist_denoised2{i,1} = sortrows(peaklist_denoised2{i,1},1);
```

```

% calculate monoisotopic mass ('Mass_peptide')
% and mass of isotopomers in a spectrum by
% using m/z value and charge. Store this value in the
% 4th column of 'peaklist_denoised2'.

% loop over peaklist_denoised2.
for j=1:length(peaklist_denoised2{i,1}(:,1));

% store the mass of the peptide in the 4th column of the
% matrix describing the scan event
m_z = peaklist_denoised2{i,1}{j,1};
Mass_peptide = (m_z * z) - (z * mass_proton);
peaklist_denoised2{i,1}{j,4}= Mass_peptide;

end % close the loop

end % close the loop

```

## Calculate mass of isotopomers

```

% To calculate the average mass, the mass of each isotopomer in a
% zoom scan spectrum is multiplied by its ion intensity. These values, the
% 'weighted ions' are stored in the fifth column of a spectrum matrix.
% the sum of all weighted ions is divided by the sum of all the ion counts
% to yield the average mass.

% Loop over the length of 'peaklist_denoised2'.
for i=1:length(peaklist_denoised2)

% Loop over the length of the matrix describing the scan event.
for j=1:length(peaklist_denoised2{i,1}(:,1))

% calculate all weighted ions. Store in column five of a spectrum matrix.
peaklist_denoised2{i,1}{j,5}= peaklist_denoised2{i,1}{j,4} *
peaklist_denoised2{i,1}{j,2};

end % close the loop

end % close the loop

```

## Calculate the mass difference between isotopomers

```

% It is possible that besides the protonated form, the same peptides with
% adducts (ammonia, potassium, sodium, etc) or the oxidized form of the
% corresponding peptide appears within the same zoom scan. Even with a
% narrow zoom scan window, this can occur for highly charged (>7+) ions.
% To discard spectra that contain these interfering peaks of
% adducts or oxidized residues, the mass difference between the last and
% first isotopomer in a zoom scan spectrum is calculated. If this mass
% difference is above 14 Da, the spectrum is discarded.

% Loop over the length of 'peaklist_denoised2'.
for i=1:length(peaklist_denoised2)

```

```

    % calculate the difference between the first and last mass of the
    % present isotopomers in a spectrum
    peaklist_denoised2{i,1}{1,6} = (peaklist_denoised2{i,1}{end,4}) -
    (peaklist_denoised2{i,1}{1,4});

end % close the loop

% Start to write at row 1 when storing preserved spectra
row = 1;

% Loop over the length of 'peaklist_denoised2'.
for i=1:length(peaklist_denoised2)

    % check if the mass difference in a spectrum between the first and last
    % isotopomer is smaller than 14 Da.
    if peaklist_denoised2{i,1}{1,6} < 14

        % preserve relevant information
        peaklist_denoised3{row,1} = peaklist_denoised2{i,1};
        peaklist_denoised3{row,2} = peaklist_denoised2{i,3};

        % move to the next row
        row = row+1;

    end % close the loop

end % close the loop

```

## Calculate average mass

```

% Loop over the length of 'peaklist_denoised3'
for i=1:length(peaklist_denoised3)

    % Sum all ion counts (column 2 in a scan matrix)
    sum_ion = sum(cell2mat(peaklist_denoised3{i,1}{:,2}));

    % Sum all 'weighted ions' (column 5 in a scan matrix).
    sum_weighion = sum(cell2mat(peaklist_denoised3{i,1}{:,5}));

    % Divide sum of 'weighted ions' by sum 'ions', resulting in the 'average mass'.
    % store average mass in matrix 'mass' (column 2)
    mass(i,2)=sum_weighion/sum_ion;

    % store the monoisotopic mass in the matrix 'mass' (column 1)
    mass(i,1)=peaklist_denoised3{i,1}{1,4};

end % close the loop

```

## Add scan number to data matrix

```

% Loop over the length of peaklist_denoised2
for i=1:length(peaklist_denoised2)

    % Add scan number in column 3 of matrix 'mass'
    mass(i,3)= peaklist_denoised2{i,3};

```



```
end % close the loop
```

## Data generation for 3D plot

```
% Using the formula's given in the corresponding article, calculate nominal
% mass, NMD and NIS.

% loop over the length of 'mass'
for i=1:length(mass)

    % Store the nominal mass in the fourth column of matrix 'mass'.
    mass(i,4) = round( double(((mass(i,1)*0.9995)))));

end % close the loop

% One has now: the monoisotopic mass (mass(i,1)), average mass (mass(i,2))
% and nominal mass (mass(i,4)) and the corresponding scannumber in
% (mass(i,3)).

% loop over the length of 'mass'
for i=1:length(mass)

    % Calculate the NMD and NIS and store in matrix mass(i,5) and mass(i,6)
    % respectively.
    mass(i,5) = 1000 * ( mass(i,1)-mass(i,4) ) / mass(i,1);
    mass(i,6) = 1000 * ( mass(i,2)-mass(i,1) ) / mass(i,1);

end % close the loop

% loop over the length of 'mass'
for i=1:length(mass)

    % Put in the table 'mass' the first isotopomer (m/z peak) in column 7
    mass(i,7) = peaklist_denoised2{i,1}{1,1};

end % close the loop
```

## Remove miscalculated NMD values

```
% filter on NMD values (mass(i,5)). The NMD value must be between 0 and 1.
% These limits are defined as x1 (0) and x2 (1).

% Set limits
x1 = 0;
x2 = 1;

% Start to write at row one when storing information
row = 1;

% loop over the length of 'mass'
for i=1:length(mass)
```

```

% Keep scans that have NMD between X2 and X1.
if mass(i,5) <= X2 && mass(i,5) >= X1;

    % Preserve relevant data.
    mass2(row,1) = mass(i,1);
    mass2(row,2) = mass(i,2);
    mass2(row,3) = mass(i,3);
    mass2(row,4) = mass(i,4);
    mass2(row,5) = mass(i,5);
    mass2(row,6) = mass(i,6);
    mass2(row,7) = mass(i,7);

    % move to the next row
    row = row+1;

end % close the loop

end % close the loop

```

## Remove miscalculated NIS values

```

% filter on NIS values (mass(i,6)). The NMD value must be between 0 and 1.
% These limits are defined as Y1 (0) and Y2 (1).

% Set limits
Y1 = 0;
Y2 = 1;

% Start to write at row one when storing information
row = 1;

% loop over the length of 'mass'
for i=1:length(mass2)

    % Keep scans that have NMD between X2 and X1.
    if mass2(i,6) <= Y2 && mass2(i,6) >= Y1;
        mass3(row,1) = mass2(i,1);
        mass3(row,2) = mass2(i,2);
        mass3(row,3) = mass2(i,3);
        mass3(row,4) = mass2(i,4);
        mass3(row,5) = mass2(i,5);
        mass3(row,6) = mass2(i,6);
        mass3(row,7) = mass2(i,7);

        % add charge to row 8
        mass3(row,8) = round(mass2(i,2)/mass2(i,7));

        % move to the next row
        row = row+1;

    end % close the loop

end % close the loop

```

## Add fraction number to matrix 'mass3'

```
mass3(:,9) = Fraction_nr;
```

## Generate the 3D mass map

```
% make a 3D scatterplot using scatter3(x,y,z,s,t). the
% values for x, y and z are corresponding to NMD, NIS and MASS and
% the 's' is the size (area) of each marker as determined in the vector s.
% The 't' is the color of the marker.

%NMD
x = mass3(:,5);
%NIS
y = mass3(:,6);
%MASS
z = mass3(:,1);

s = 15;
t = 'k';

% Make the plot

plot = scatter3(x, y, z, s, t, 'fill','MarkerEdgeColor',[0 0 0]); hold on
```

## 3D mass map properties

```
% Get the handle to the figure and set the background color to white.
set(gcf, 'color', [1 1 1])

% Get the handle to the current axis and set the color of the background
% to a shade of grey.
set(gca, 'color', [0.4 0.4 0.4])

% Get the handle to the current axis and set the color of all three
% axis to black.
set(gca, 'xcolor', 'k')
set(gca, 'ycolor', 'k')
set(gca, 'zcolor', 'k')

% Label the x, y and z axis accordingly. The default fontsize of the labels
% is 10. Set to size 12.
xlabel('NMD', 'FontSize', 12);
ylabel('NIS', 'FontSize', 12);
zlabel('mass (Da)', 'FontSize', 12);

% get the handle to the current axis and set fontsize to 12.
set(gca, 'FontSize', 12)

% set axis min and max values using 'axis([ xmin xmax ymin ymax zmin zmax])
% depending on the NMD (x), NIS (y) and mass (z) of peptides in the mzXML
% file that was processed. In general NMD ranges from 0.3 to 0.7 and NIS
% ranges from 0.55 to 0.95. The mass of the peptides can vary and thus be
```

```
% set accordingly here. To include all peptides one can use max(mass3(:,1))
axis([0.3 0.7 0.55 0.95 0 max(mass3(:,1))]);
```

## Set view of 3D mass map

```
% default view is 'view(3)'. Some 2D representational views are
% listed below.
```

```
%% For 2D view of NMD vs NIS, use:
% view([0 0 1])
```

```
%% For 2D view of NMD vs Mass, use:
% view([0 -1 0])
```

```
%% For 2D view of NIS vs Mass, use:
% view([1 0 0])
```

## Export table 'mass3' to an EXCEL file

```
% Upon creating a new sheet in a new EXCEL file, MATLAB throws a warning.
% disable the warning
warning('off', 'MATLAB:xlswrite:AddSheet')

% set headers accordingly to columns in 'mass3' and write in sheet 1.
header = {'mono' 'av' 'scannr' 'nominal' 'nmd' 'nis' 'm/z' 'charge' 'Fr.Nr.'};
xlswrite(title, header, '1');

% write data starting at cell A2 on sheet 1.
xlswrite(title, mass3, '1', 'A2');
```

*Published with MATLAB® R2014a*
